# Supplementary material
Source: Research Square preprint supplement (doi:10.21203/rs.3.rs-8929948/v1)
Supplement: Supplementary file 1 [file 72c669c5f37b15c532ab18d9.docx]

**Appendix**

1. **Question asked to participants about their routes of administration.**

Q4.8 In the past 6 months, how do you usually use street opioids, i.e. MAIN route of administration? (e.g. injection, snorting, smoking). [Open text input]

**B. Fentanyl dosing terms and conversions.**

Exploratively characterizing average fentanyl dosing and prices in the market, respondents were asked what the average amount of fentanyl consumed on a ‘using’ day is. Dosage conversions (Table B1) were sourced from a person with lived experience leading a harm reduction and overdose outreach volunteer group, with close connections with Vancouver Downtown Eastside community. Dosing distributions will be further explored in future analyses.

**Table B. Conversions from fentanyl dosing terms in the street drug market to quantifications and typical prices.**

| **Term** | **Fentanyl dose conversion** |
| --- | --- |
| **1 ‘point’** | **0.1 g ($20)** |
| **1 ‘ball’** | **3.5 g ($30-35; “ball” refers to an 8th ball = 1/8th of an ounce; ‘half ball’ = 1.75g)** |
| **1 ‘zip’** | **28.3 g (1 oz)** |
| **1 ‘paper’** | **0.05g ($10)** |
